# Supplementary material for: Fabricating a super stable luminescent chemosensor with multi-stimuli-response to metal ions and small organic molecules through turn-on and turn-off effects
Source: Royal Society of Chemistry journal article supplement (doi:10.1039/c7tc00508c), 2017-01-01
Supplement: c7tc00508c1.pdf [file c7tc00508c1.pdf]

## Supporting Information

### **Fabricating a super stable luminescent chemosensor with multi-stimuli-response to metal ions and small organic molecules by turn-on and turn-off effects**

Yan Yang,<sup>a,b</sup> Lian Chen,<sup>\*a</sup> Feilong Jiang,<sup>a</sup> Xiuyan Wan,<sup>a,b</sup> Muxin Yu,<sup>a,b</sup> Zhen Cao,<sup>a,b</sup> Tan Jing,<sup>a,b</sup> and Maochun Hong<sup>\*</sup>

*<sup>a</sup>State Key Laboratory of Structure Chemistry, Fujian Institute of Research on the Structure of Matter, Chinese Academy of Sciences, Fuzhou 350002, China.*

*<sup>b</sup>University of the Chinese Academy of Sciences, Beijing, 10049, China*

## Contents

### Additional Experimental Section

**Table S1.** Crystal data and refinement results for compounds **1** and **2**.

**Fig. S1** Coordination environment of the  $\text{Eu}^{3+}$  ion in compound **1**.

**Fig. S2** The coordination mode of  $[\text{L}]^+$  in **1**:  $\mu_8$ -bridging mode.

**Fig. S3** The encapsulated counter cations  $[\text{H}_2\text{NMe}_2]^+$  in channel A.

**Fig. S4** (a) The simplified 6-connected node of the binuclear unit  $[\text{Eu}_2(\mu_2\text{-COO})_2(\text{COO})_2]$ . (b) The simplified 3-connected node of the ligand. (c) The (3, 6)-connected topological two-nodal net with the Schläfli symbol  $\{4^2.6\}_2\{4^4.6^2.8^7.10^2\}$  in compound **1**.

**Fig. S5** PXRD patterns of compounds **1** and **2**.

**Fig. S6** The TGA curves of compounds **1** and **2**.

**Fig. S7** Room-temperature luminescent spectra of (a) the ligand  $\text{H}_4\text{L}$  (excitation: dot,  $\lambda_{\text{em}} = 425$  nm; emission: solid,  $\lambda_{\text{ex}} = 350$  nm) (b) compound **1** in solid state. (c) The luminescence decay curves compound **1** at room temperature.

**Fig. S8** The Stern-Volmer plot between the enhancing effect and the concentration of  $\text{Cd}^{2+}$  ions at low concentrations.

**Fig. S9** Comparison of the  ${}^5\text{D}_0 \rightarrow {}^7\text{F}_2$  luminescence intensity of **1** in aqueous solutions incorporating (a)  $\text{Mn}^{2+}$  ions and (b)  $\text{Cd}^{2+}$  ions in different times when excited at 324 nm.

**Fig. S10** PXRD patterns of **1** after dispersed in different  $\text{M}(\text{NO}_3)_x$  ( $x = \text{Na}^+, \text{K}^+, \text{Cu}^{2+}, \text{Zn}^{2+}, \text{Cd}^{2+}, \text{Ni}^{2+}, \text{Mn}^{2+}, \text{Pb}^{2+}, \text{Mg}^{2+}, \text{Co}^{2+}, \text{Cr}^{3+}, \text{Tb}^{3+}, \text{Al}^{3+}, \text{Ag}^+, \text{Fe}^{3+}$ ) in aqueous water solvents.

**Table S2** The ICP results of compound **1** and  $\text{M}^{\text{n+}}\text{-1}$  ( $\text{M}^{\text{n+}} = \text{Na}^+, \text{K}^+, \text{Cu}^{2+}, \text{Zn}^{2+}, \text{Cd}^{2+}, \text{Ni}^{2+}, \text{Mn}^{2+}, \text{Pb}^{2+}, \text{Mg}^{2+}, \text{Co}^{2+}, \text{Cr}^{3+}, \text{Tb}^{3+}, \text{Al}^{3+}, \text{Ag}^+, \text{Fe}^{3+}$ , respectively).

**Scheme S1.** Simplified views of the probable luminescent enhancing and quenching mechanisms of compound **1** by  $\text{Cd}^{2+}$  and  $\text{Mn}^{2+}$  ions.

**Fig. S11** Comparison of the  ${}^5\text{D}_0 \rightarrow {}^7\text{F}_2$  luminescence intensity of **1** in the presence of diethyl ether vapor in different times.

**Fig. S12** PXRD patterns of the samples before and after the regeneration studies.

**Fig. S13** (a) Solid-state luminescent spectra of compound **2** and (b) the luminescence decay curves compound **2** at room temperature.

**Fig. S14** Comparison of the  $^5D_4 \rightarrow ^7F_5$  luminescence intensity of **2** in aqueous solutions incorporating different metal ions when excited at 331 nm.

**Fig. S15** Comparison of the  $^5D_4 \rightarrow ^7F_5$  luminescence intensity of **2a** introduced into various pure solvent emulsions when excited at 331 nm.

**Fig. S16** Comparison of the  $^5D_4 \rightarrow ^7F_5$  luminescence intensity of **2** in the presence of diethyl ether vapour at different times excited at 331 nm.

**Fig. S17** Cycles of sensing diethyl ether vapor for compound **2**.

**Table S3.** Selected bond lengths (Å) and bond angles (°) for compounds **1** and **2**.

## Additional Experimental Section

In order to confirm that the mechanism for compound **1** as such a multi-stimuli-responsive sensor of metal ions and small molecules is due to the features of the framework itself, compound **2** ( $[\text{Me}_2\text{NH}_2][\text{TbL}(\text{H}_2\text{O})]\cdot 1.5\text{H}_2\text{O}$ ), the isomorphous structure of compound **1**, was synthesized similarly to **1** except for the use of  $\text{Tb}(\text{NO}_3)_3\cdot 6\text{H}_2\text{O}$  as starting material. Elemental analysis (%): Calcd for  $\text{C}_{23}\text{H}_{22}\text{TbN}_2\text{O}_{10.5}$ , C, 42.28; H, 3.39; N, 4.29. Found: C, 42.42; H, 3.46; N, 4.35. The PXRD pattern indicates that **1** and **2** are isostructural (Fig. S5).

The CCDC number for compound **2** is 1481268. Crystal data and structure refinements for compound **2** are also listed in Table S1, which are available in CIF files in the supporting information.

**Table S1.** Crystal data and refinement results for compounds **1** and **2**.

|                               | <b>1</b>                                                           | <b>2</b>                                                           |
|-------------------------------|--------------------------------------------------------------------|--------------------------------------------------------------------|
| Formula                       | C <sub>23</sub> H <sub>22</sub> EuN <sub>2</sub> O <sub>10.5</sub> | C <sub>23</sub> H <sub>22</sub> TbN <sub>2</sub> O <sub>10.5</sub> |
| Formula weight                | 646.39                                                             | 653.36                                                             |
| Crystal system                | monoclinic                                                         | monoclinic                                                         |
| space group                   | C2/c                                                               | C2/c                                                               |
| <i>a</i> (Å)                  | 19.6675 (3)                                                        | 19.6084 (4)                                                        |
| <i>b</i> (Å)                  | 11.9457 (2)                                                        | 11.9016 (3)                                                        |
| <i>c</i> (Å)                  | 21.9773 (4)                                                        | 21.9364 (5)                                                        |
| <i>α</i> (°)                  | 90                                                                 | 90                                                                 |
| <i>β</i> (°)                  | 97.166 (2)                                                         | 97.186 (2)                                                         |
| <i>γ</i> (°)                  | 90                                                                 | 90                                                                 |
| Volume (Å <sup>3</sup> )      | 5123.06 (15)                                                       | 5079.1 (2)                                                         |
| T (K)                         | 100                                                                | 100                                                                |
| Z                             | 8                                                                  | 8                                                                  |
| F (000)                       | 2216                                                               | 2248                                                               |
| R <sub>1</sub> (I>2σ(I))      | 0.0316                                                             | 0.0291                                                             |
| wR <sub>2</sub> (reflections) | 0.1023                                                             | 0.0748                                                             |

<sup>a</sup>R<sub>1</sub> = Σ||F<sub>o</sub>| - |F<sub>c</sub>||/Σ|F<sub>o</sub>|. <sup>b</sup>ωR<sub>2</sub> = [Σω(F<sub>o</sub><sup>2</sup> - F<sub>c</sub><sup>2</sup>)<sup>2</sup>/Σω(F<sub>o</sub><sup>2</sup>)<sup>2</sup>]<sup>1/2</sup>.

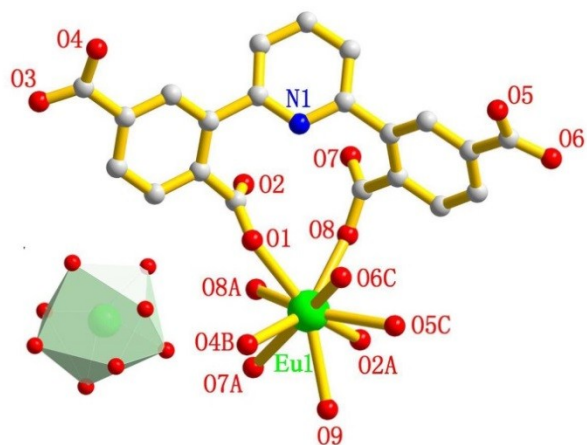

**Fig. S1** Coordination environment of the  $\text{Eu}^{3+}$  ion in compound **1**. All H atoms and solvent molecules are omitted. Inset: coordination polyhedron of  $\text{Eu}^{3+}$  ion. (Symmetry codes: A,  $3/2-x, 3/2-y, 1-z$ ; B,  $3/2-x, 1/2+y, 1/2-z$ ; C,  $2-x, 1-y, 1-z$ .  $\text{Eu}^{3+}$ , green; O, red; N, blue; C, gray).

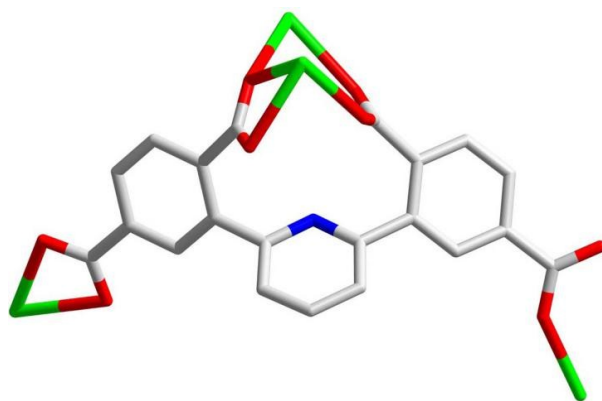

**Fig. S2** The coordination mode of  $[\text{L}]^{4+}$  in **1**:  $\mu_8$ -bridging mode.

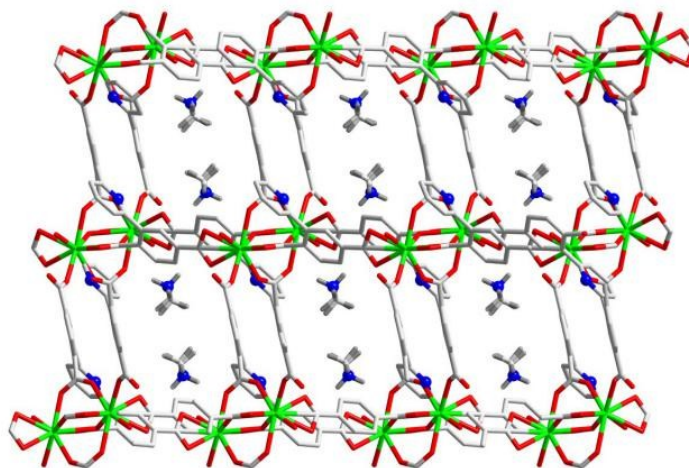

**Fig. S3** The encapsulated counter cations  $[\text{H}_2\text{NMe}_2]^+$  in channel A.

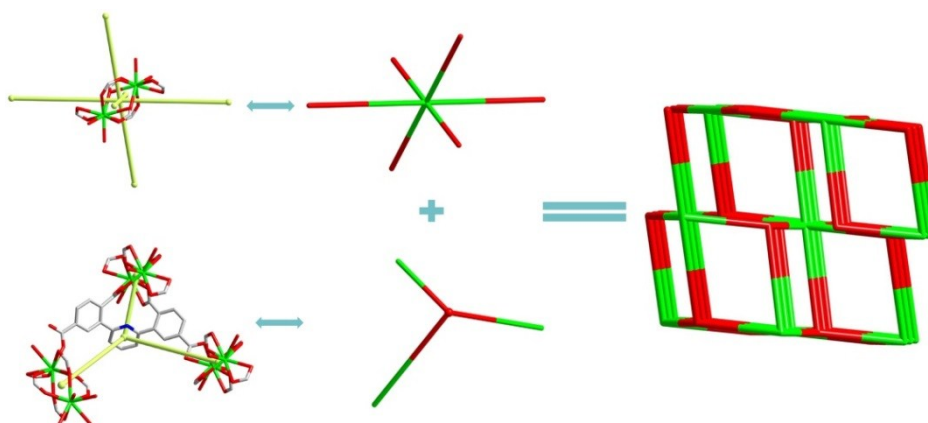

**Fig. S4** (a) The simplified 6-connected node of the binuclear unit  $[\text{Eu}_2(\mu_2\text{-COO})_2(\text{COO})_2]$ . (b) The simplified 3-connected node of the ligand. (c) The (3, 6)-connected topological two-nodal net with the Schläfli symbol  $\{4^2.6\}_2\{4^4.6^2.8^7.10^2\}$  in compound **1**.

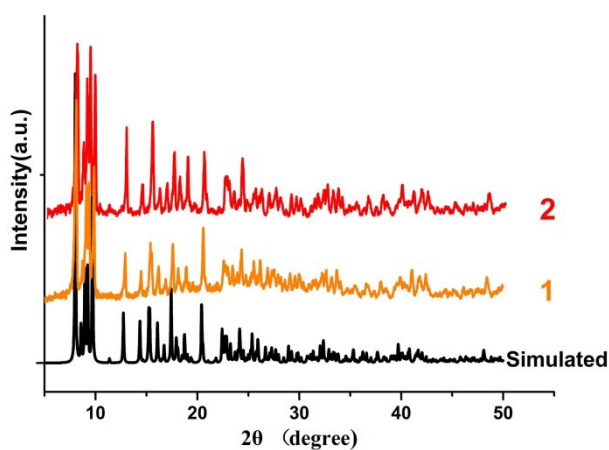

**Fig. S5** PXRD patterns of compounds **1** and **2**.

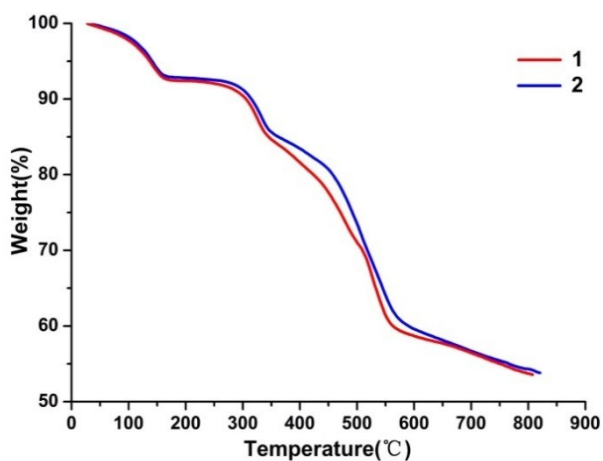

**Fig. S6** The TGA curves of compounds **1** and **2**.

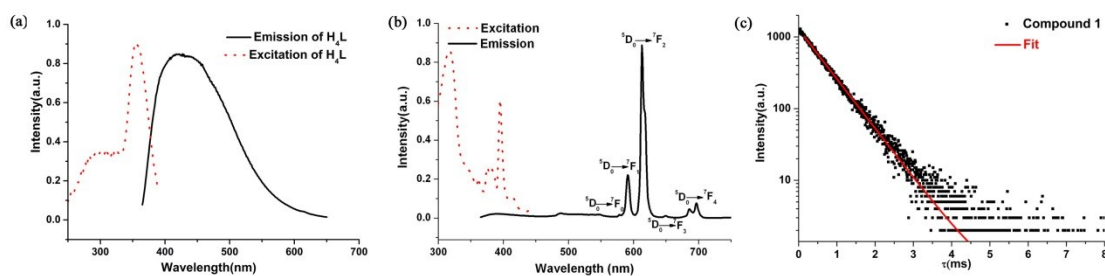

**Fig. S7** Room-temperature luminescent spectra of (a) the ligand H<sub>4</sub>L (excitation: dot,  $\lambda_{em}$  = 425 nm; emission: solid,  $\lambda_{ex}$  = 350 nm) (b) compound **1** in solid state. (c) The luminescence decay curves compound **1** at room temperature.

**Table S2.** The ICP results of compound **1** and M<sup>n+</sup>-**1** (M<sup>n+</sup> = Na<sup>+</sup>, K<sup>+</sup>, Cu<sup>2+</sup>, Zn<sup>2+</sup>, Cd<sup>2+</sup>, Ni<sup>2+</sup>, Mn<sup>2+</sup>, Pb<sup>2+</sup>, Mg<sup>2+</sup>, Co<sup>2+</sup>, Cr<sup>3+</sup>, Tb<sup>3+</sup>, Al<sup>3+</sup>, Ag<sup>+</sup>, Fe<sup>3+</sup>, respectively)

| Compound                    | Eu <sup>3+</sup> (wt%) | M <sup>n+</sup> (wt%) | Compound                    | Eu <sup>3+</sup> (wt%) | M <sup>n+</sup> (wt%) |
|-----------------------------|------------------------|-----------------------|-----------------------------|------------------------|-----------------------|
| <b>1</b>                    | 19.03                  | -                     | Pb <sup>2+</sup> - <b>1</b> | 16.28                  | 3.98                  |
| <b>Cd<sup>2+</sup>-1</b>    | <b>18.74</b>           | <b>5.87</b>           | Co <sup>2+</sup> - <b>1</b> | 20.59                  | 0.325                 |
| Tb <sup>3+</sup> - <b>1</b> | 18.10                  | 0.84                  | Na <sup>+</sup> - <b>1</b>  | 17.78                  | 3.03                  |
| K <sup>+</sup> - <b>1</b>   | 18.04                  | 3.61                  | Fe <sup>3+</sup> - <b>1</b> | 17.25                  | 0.55                  |
| Ag <sup>+</sup> - <b>1</b>  | 17.44                  | 7.73                  | Ni <sup>2+</sup> - <b>1</b> | 21.36                  | 0.081                 |
| Mg <sup>2+</sup> - <b>1</b> | 18.28                  | 0.0607                | Cu <sup>2+</sup> - <b>1</b> | 17.51                  | 1.30                  |
| Al <sup>3+</sup> - <b>1</b> | 20.14                  | 0.36                  | Zn <sup>2+</sup> - <b>1</b> | 19.46                  | 3.00                  |
| Cr <sup>3+</sup> - <b>1</b> | 19.80                  | 0.134                 | <b>Mn<sup>2+</sup>-1</b>    | <b>19.70</b>           | <b>2.98</b>           |

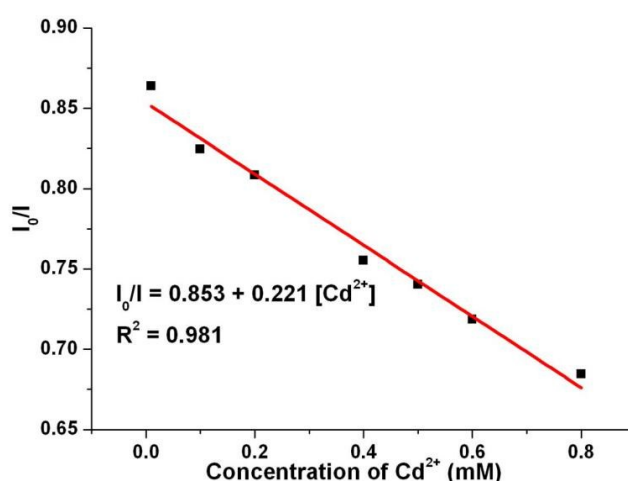

**Fig. S8** The Stern-Volmer plot between the enhancing effect and the concentration of Cd<sup>2+</sup> ions at low concentrations.



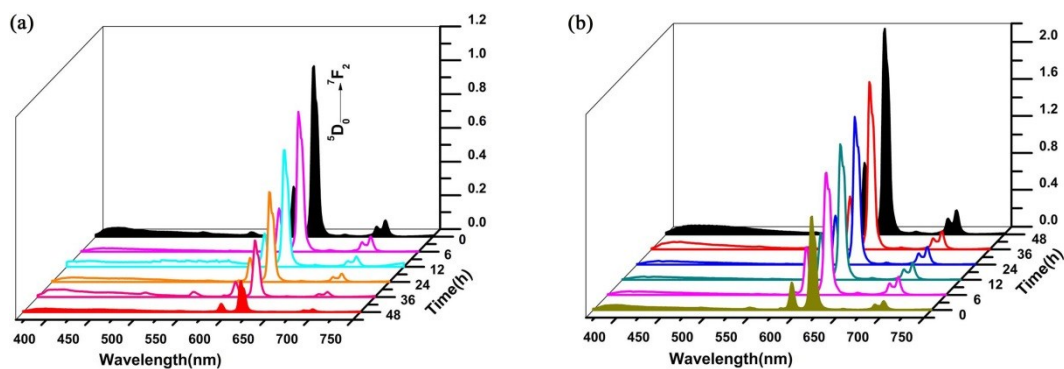

**Fig. S9** Comparison of the  ${}^5D_0 \rightarrow {}^7F_2$  luminescence intensity of **1** in aqueous solutions incorporating (a)  $Mn^{2+}$  ions and (b)  $Cd^{2+}$  ions in different times when excited at 324 nm.

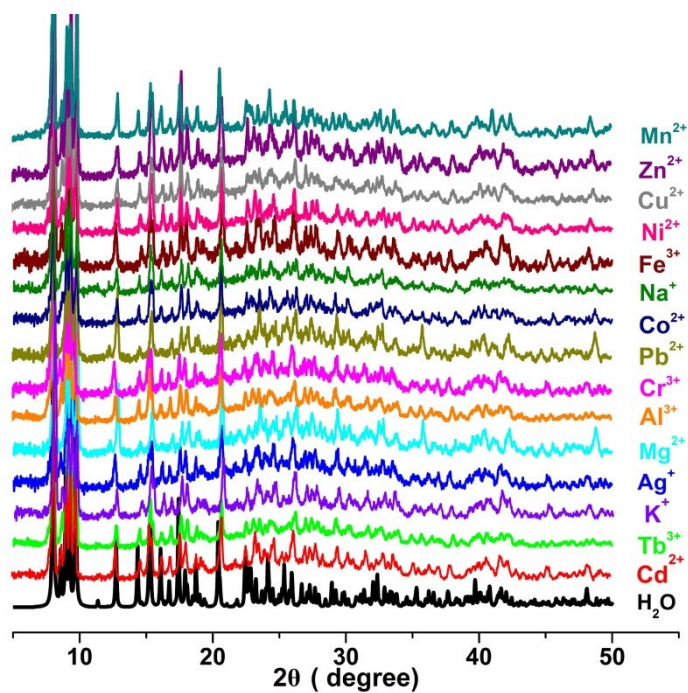

**Fig. S10** PXRD patterns of **1** after dispersed in different  $M(NO_3)_x$  ( $x = Na^+, K^+, Cu^{2+}, Zn^{2+}, Cd^{2+}, Ni^{2+}, Mn^{2+}, Pb^{2+}, Mg^{2+}, Co^{2+}, Cr^{3+}, Tb^{3+}, Al^{3+}, Ag^+, Fe^{3+}$ ) in aqueous water solvents.

**Scheme S1.** Simplified views of the probable luminescent enhancing and quenching mechanisms of compound **1** by  $\text{Cd}^{2+}$  and  $\text{Mn}^{2+}$  ions.

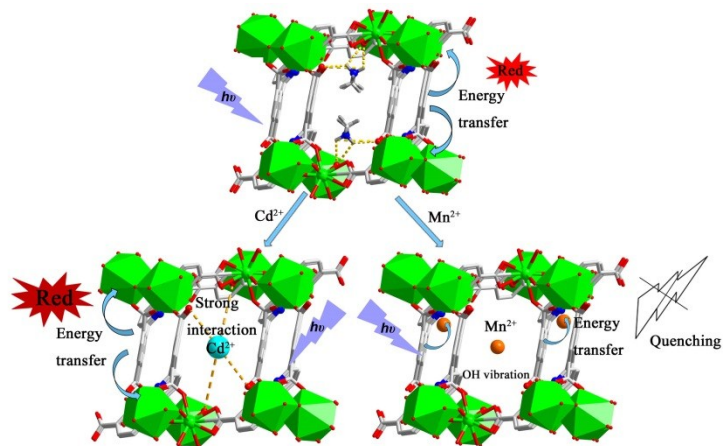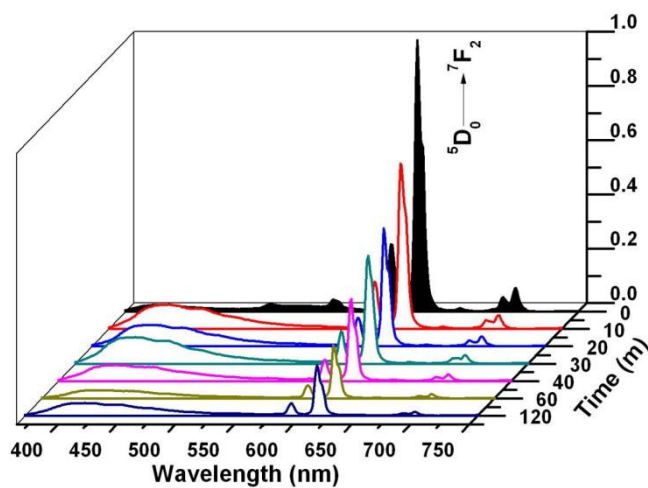

**Fig. S11** Comparison of the  ${}^5\text{D}_0 \rightarrow {}^7\text{F}_2$  luminescence intensity of **1** in the presence of diethyl ether vapour in different times.

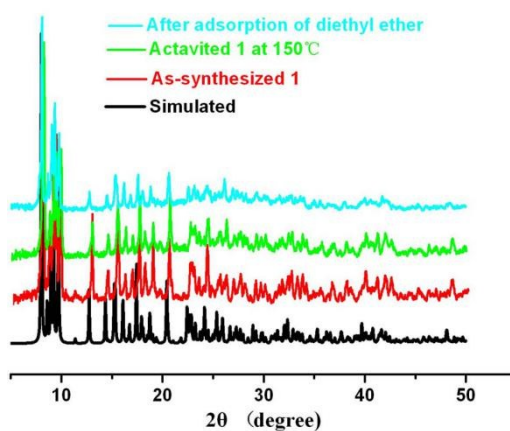

**Fig. S12** PXRD patterns of the samples before and after the regeneration studies.

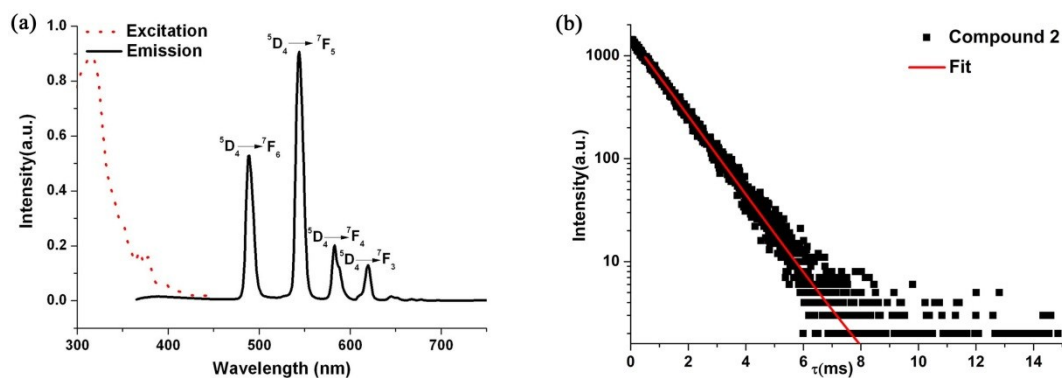

**Fig. S13** (a) Solid-state luminescent spectra of compound **2** and (b) the luminescence decay curves compound **2** at room temperature.

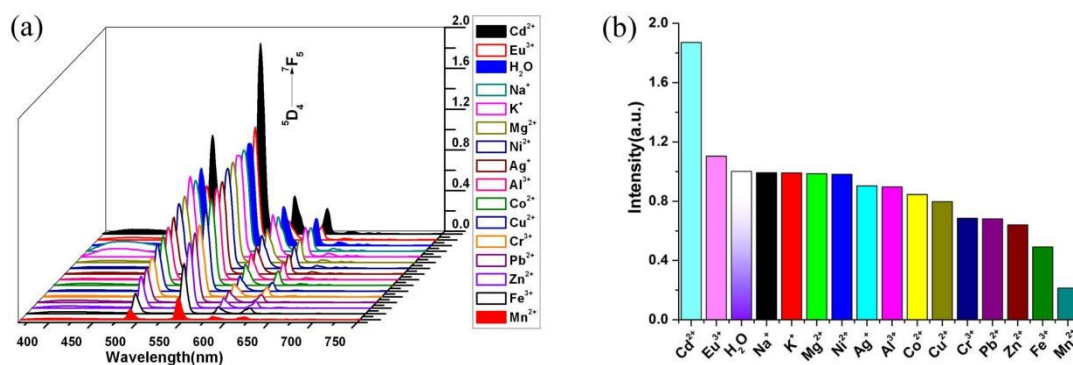

**Fig. S14** Comparison of the  $^5D_4 \rightarrow ^7F_5$  luminescence intensity of **2** in aqueous solutions incorporating different metal ions when excited at 331 nm.

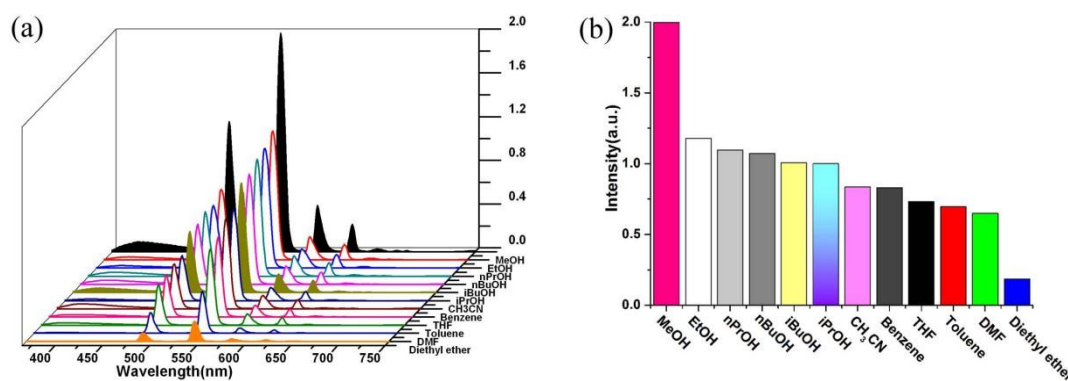

**Fig. S15** Comparison of the  $^5D_4 \rightarrow ^7F_5$  luminescence intensity of **2a** introduced into various pure solvent emulsions when excited at 331 nm.

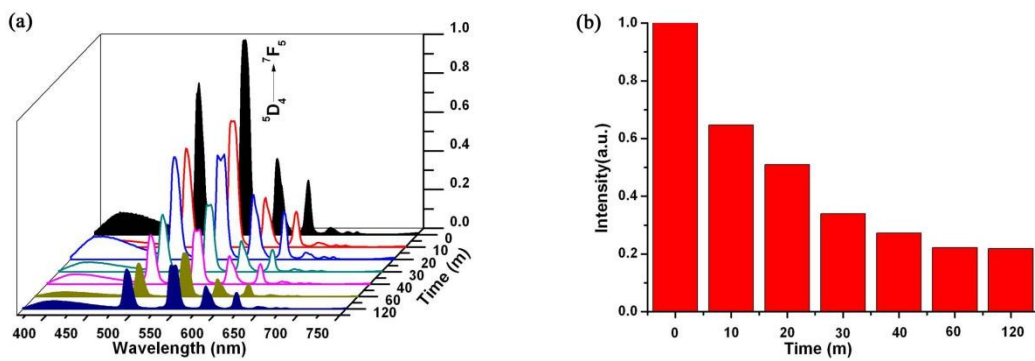

**Fig. S16** Comparison of the  ${}^5D_4 \rightarrow {}^7F_5$  luminescence intensity of **2** in the presence of diethyl ether vapour at different times excited at 331 nm.

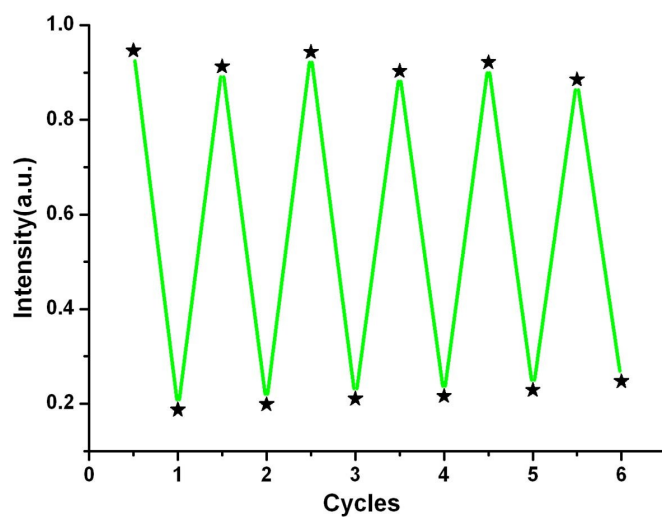

**Fig. S17** Cycles of sensing diethyl ether vapor for compound **2**.

**Table S3.** Selected bond lengths (Å) and bond angles (°) for compounds **1** and **2**.

| Bond                                    | Dist.       | Bond                                     | Dist.       |
|-----------------------------------------|-------------|------------------------------------------|-------------|
| Eu1—O4 <sup>i</sup>                     | 2.338 (3)   | Eu1—O7 <sup>ii</sup>                     | 2.488 (3)   |
| Eu1—O8                                  | 2.378 (3)   | Eu1—O5 <sup>iii</sup>                    | 2.489 (3)   |
| Eu1—O1                                  | 2.383 (3)   | Eu1—O9                                   | 2.583 (4)   |
| Eu1—O2 <sup>ii</sup>                    | 2.422 (3)   | Eu1—O8 <sup>ii</sup>                     | 2.632 (3)   |
| Eu1—O6 <sup>iii</sup>                   | 2.445 (4)   |                                          |             |
| Angle                                   | (°)         | Angle                                    | (°)         |
| O4 <sup>i</sup> —Eu1—O8                 | 146.11 (12) | O2 <sup>ii</sup> —Eu1—O5 <sup>iii</sup>  | 78.78 (11)  |
| O4 <sup>i</sup> —Eu1—O1                 | 74.27 (12)  | O6 <sup>iii</sup> —Eu1—O5 <sup>iii</sup> | 52.64 (11)  |
| O8—Eu1—O1                               | 74.16 (11)  | O7 <sup>ii</sup> —Eu1—O5 <sup>iii</sup>  | 134.30 (11) |
| O4 <sup>i</sup> —Eu1—O2 <sup>ii</sup>   | 139.60 (12) | O4 <sup>i</sup> —Eu1—O9                  | 75.11 (11)  |
| O8—Eu1—O2 <sup>ii</sup>                 | 73.82 (11)  | O8—Eu1—O9                                | 137.46 (11) |
| O1—Eu1—O2 <sup>ii</sup>                 | 136.40 (11) | O1—Eu1—O9                                | 148.33 (11) |
| O4 <sup>i</sup> —Eu1—O6 <sup>iii</sup>  | 77.24 (14)  | O2 <sup>ii</sup> —Eu1—O9                 | 68.36 (11)  |
| O8—Eu1—O6 <sup>iii</sup>                | 83.30 (13)  | O6 <sup>iii</sup> —Eu1—O9                | 105.18 (13) |
| O1—Eu1—O6 <sup>iii</sup>                | 75.66 (12)  | O7 <sup>ii</sup> —Eu1—O9                 | 65.49 (12)  |
| O2 <sup>ii</sup> —Eu1—O6 <sup>iii</sup> | 128.22 (11) | O5 <sup>iii</sup> —Eu1—O9                | 70.53 (12)  |
| O4 <sup>i</sup> —Eu1—O7 <sup>ii</sup>   | 75.42 (13)  | O4 <sup>i</sup> —Eu1—O8 <sup>ii</sup>    | 106.37 (12) |
| O8—Eu1—O7 <sup>ii</sup>                 | 121.59 (11) | O8—Eu1—O8 <sup>ii</sup>                  | 73.63 (12)  |
| O1—Eu1—O7 <sup>ii</sup>                 | 98.83 (11)  | O1—Eu1—O8 <sup>ii</sup>                  | 69.89 (10)  |
| O2 <sup>ii</sup> —Eu1—O7 <sup>ii</sup>  | 74.22 (11)  | O2 <sup>ii</sup> —Eu1—O8 <sup>ii</sup>   | 73.22 (10)  |
| O6 <sup>iii</sup> —Eu1—O7 <sup>ii</sup> | 152.57 (12) | O6 <sup>iii</sup> —Eu1—O8 <sup>ii</sup>  | 142.51 (12) |
| O4 <sup>i</sup> —Eu1—O5 <sup>iii</sup>  | 105.05 (13) | O7 <sup>ii</sup> —Eu1—O8 <sup>ii</sup>   | 50.83 (10)  |
| O8—Eu1—O5 <sup>iii</sup>                | 83.87 (12)  | O5 <sup>iii</sup> —Eu1—O8 <sup>ii</sup>  | 147.92 (11) |
| O1—Eu1—O5 <sup>iii</sup>                | 125.79 (11) | O9—Eu1—O8 <sup>ii</sup>                  | 111.84 (11) |

Symmetry codes: (i) 1/2-x, 1/2+y, -1/2-z; (ii) 1/2-x, 1/2-y, -z; (iii) 1-x, -y, -z.

| Bond                                   | Dist.       | Bond                                     | Dist.       |
|----------------------------------------|-------------|------------------------------------------|-------------|
| Tb1—O4 <sup>i</sup>                    | 2.326 (2)   | Tb1—O7 <sup>ii</sup>                     | 2.457 (2)   |
| Tb1—O8                                 | 2.354 (2)   | Tb1—O5 <sup>iii</sup>                    | 2.4763 (11) |
| Tb1—O1                                 | 2.354 (2)   | Tb1—O9                                   | 2.5465 (11) |
| Tb1—O2 <sup>ii</sup>                   | 2.392 (2)   | Tb1—O8 <sup>ii</sup>                     | 2.613 (2)   |
| Tb1—O6 <sup>iii</sup>                  | 2.4149 (10) |                                          |             |
| Angle                                  | (°)         | Angle                                    | (°)         |
| O4 <sup>i</sup> —Tb1—O8                | 145.69 (8)  | O8—Tb1—O5 <sup>iii</sup>                 | 83.75 (6)   |
| O4 <sup>i</sup> —Tb1—O1                | 73.74 (8)   | O1—Tb1—O5 <sup>iii</sup>                 | 125.68 (6)  |
| O8—Tb1—O1                              | 74.32 (7)   | O2 <sup>ii</sup> —Tb1—O5 <sup>iii</sup>  | 78.56 (6)   |
| O4 <sup>i</sup> —Tb1—O2 <sup>ii</sup>  | 139.69 (8)  | O6 <sup>iii</sup> —Tb1—O5 <sup>iii</sup> | 53.1        |
| O8—Tb1—O2 <sup>ii</sup>                | 74.19 (7)   | O7 <sup>ii</sup> —Tb1—O5 <sup>iii</sup>  | 134.85 (6)  |
| O1—Tb1—O2 <sup>ii</sup>                | 137.02 (7)  | O4 <sup>i</sup> —Tb1—O9                  | 75.43 (6)   |
| O4 <sup>i</sup> —Tb1—O6 <sup>iii</sup> | 76.83 (7)   | O8—Tb1—O9                                | 137.47 (6)  |

|                                         |            |                                         |            |
|-----------------------------------------|------------|-----------------------------------------|------------|
| O8—Tb1—O6 <sup>iii</sup>                | 83.15 (6)  | O1—Tb1—O9                               | 148.18 (6) |
| O1—Tb1—O6 <sup>iii</sup>                | 75.05 (6)  | O2 <sup>ii</sup> —Tb1—O9                | 68.08 (6)  |
| O2 <sup>ii</sup> —Tb1—O6 <sup>iii</sup> | 128.51 (6) | O6 <sup>iii</sup> —Tb1—O9               | 105.34 (3) |
| O4 <sup>i</sup> —Tb1—O7 <sup>ii</sup>   | 75.18 (9)  | O7 <sup>ii</sup> —Tb1—O9                | 66.05 (6)  |
| O8—Tb1—O7 <sup>ii</sup>                 | 121.85 (7) | O5 <sup>iii</sup> —Tb1—O9               | 70.41 (4)  |
| O1—Tb1—O7 <sup>ii</sup>                 | 98.28 (8)  | O4 <sup>i</sup> —Tb1—O8 <sup>ii</sup>   | 106.89 (8) |
| O2 <sup>ii</sup> —Tb1—O7 <sup>ii</sup>  | 74.83 (7)  | O8—Tb1—O8 <sup>ii</sup>                 | 73.31 (8)  |
| O6 <sup>iii</sup> —Tb1—O7 <sup>ii</sup> | 151.98 (6) | O1—Tb1—O8 <sup>ii</sup>                 | 70.29 (7)  |
| O4 <sup>i</sup> —Tb1—O5 <sup>iii</sup>  | 105.13 (7) | O2 <sup>ii</sup> —Tb1—O8 <sup>ii</sup>  | 73.14 (7)  |
| O4 <sup>i</sup> —Tb1—O8                 | 145.69 (8) | O6 <sup>iii</sup> —Tb1—O8 <sup>ii</sup> | 142.12 (5) |
| O4 <sup>i</sup> —Tb1—O1                 | 73.74 (8)  | O7 <sup>ii</sup> —Tb1—O8 <sup>ii</sup>  | 51.04 (7)  |

---

Symmetry codes: (i)  $3/2-x, 1/2+y, 1/2-z$ ; (ii)  $3/2-x, 1/2-y, 1-z$ ; (iii)  $2-x, -y, 1-z$ .
